# Supplementary material for: Nationwide geospatial analysis of county racial and ethnic composition and public drinking water arsenic and uranium
Source: PubMed Central journal article supplement (PMC9718774; doi:10.1038/s41467-022-35185-6), 2022-12-03
Supplement: 41467_2022_35185_MOESM1_ESM.pdf [file 41467_2022_35185_MOESM1_ESM.pdf]

1 Nationwide geospatial analysis of county-level racial/ethnic composition and public drinking water arsenic and uranium.

|       |                                                                                                                                                                                                                                                                                                                                                                                                                                                                                                                                                                                                                                                                                                                                    |
|-------|------------------------------------------------------------------------------------------------------------------------------------------------------------------------------------------------------------------------------------------------------------------------------------------------------------------------------------------------------------------------------------------------------------------------------------------------------------------------------------------------------------------------------------------------------------------------------------------------------------------------------------------------------------------------------------------------------------------------------------|
| Pg.3  | <b>Supplementary Fig. 1.</b> Nationwide spatial distribution of county-level community water system (CWS) metal concentrations and local indicators of spatial associations (LISA) clusters for barium and selenium.                                                                                                                                                                                                                                                                                                                                                                                                                                                                                                               |
| Pg.4  | <b>Supplementary Figure 2.</b> Directed acyclic graph for the county-level association between racial/ethnic composition and public drinking water metal concentrations.                                                                                                                                                                                                                                                                                                                                                                                                                                                                                                                                                           |
| Pg.5  | <b>Supplementary Table 1.</b> Sensitivity analyses of geometric mean ratios (95% CI) of county-level community water system (CWS) metal concentration estimates ( $\mu\text{g/L}$ ) per increases in the proportion of non-Hispanic African American, American Indian, Hispanic, and non-Hispanic White residents, from spatial lag regression models, assessing A) increases in the proportion of residents in the specified racial/ethnic group of 0.6, B) increases in the proportion of residents in the specified racial/ethnic group corresponding to the interquartile range (IQR), and C) per unit increase in the proportion of residents in the specified racial/ethnic group, restricted to counties in the western US. |
| Pg.6  | <b>Supplementary Table 2.</b> County-level community water system (CWS) arsenic and uranium concentrations per a 10 percent higher proportion of all residents not categorized as non-Hispanic White, including non-Hispanic Black, American Indian/Alaskan Native, Hispanic/Latino, from spatial lag regression models                                                                                                                                                                                                                                                                                                                                                                                                            |
| Pg.7  | <b>Supplementary Table 3.</b> County-level community water system (CWS) barium and selenium concentrations per a 10 percent higher proportion of non-Hispanic Black, American Indian/Alaskan Native, Hispanic/Latino, and non-Hispanic White residents, from spatial lag regression models                                                                                                                                                                                                                                                                                                                                                                                                                                         |
| Pg.8  | <b>Supplementary Fig. 3.</b> County-level $R^2$ values from geographically weighted regression models assessing the association between a 10 percent increase in the proportion of county population categorized as Hispanic, American Indian or Alaskan Native, non-Hispanic African American, and non-Hispanic White and geometric mean county-level community water system (CWS) arsenic.                                                                                                                                                                                                                                                                                                                                       |
| Pg.9  | <b>Supplementary Fig. 4.</b> County-level $R^2$ values from geographically weighted regression models assessing the association between a 10 percent increase in the proportion of county population categorized as Hispanic, American Indian or Alaskan Native, non-Hispanic African American, and non-Hispanic White and geometric mean county-level community water system (CWS) uranium.                                                                                                                                                                                                                                                                                                                                       |
| Pg.10 | <b>Supplementary Fig. 5.</b> County-level $R^2$ values from geographically weighted regression models assessing the association between a 10 percent increase in the proportion of county population categorized as Hispanic, American Indian or Alaskan Native, and non-Hispanic African American, and geometric mean county-level community water system (CWS) barium and selenium.                                                                                                                                                                                                                                                                                                                                              |
| Pg.11 | <b>Supplementary Fig. 6.</b> Direction and magnitude of the geometric mean ratio (GMR) of county-level community water system (CWS) barium concentrations per 10 percent higher county proportion of non-Hispanic Black, American Indian/Alaskan Native, Hispanic/Latino, and non-Hispanic White residents from geographically weighted regression models.                                                                                                                                                                                                                                                                                                                                                                         |
| Pg.12 | <b>Supplementary Fig. 7.</b> Direction and magnitude of the geometric mean ratio (GMR) of county-level community water system (CWS) selenium concentrations per 10 percent higher county proportion of non-Hispanic Black, American Indian/Alaskan Native, Hispanic/Latino, and non-Hispanic White residents from geographically weighted regression models.                                                                                                                                                                                                                                                                                                                                                                       |
| Pg.13 | <b>Supplementary Table 4.</b> County-level mean estimated community water system (CWS) metal concentrations and sociodemographic characteristics for all counties excluded from the analysis (counties with < 100 residents of each racial/ethnic group).                                                                                                                                                                                                                                                                                                                                                                                                                                                                          |
| Pg.14 | <b>Supplementary Table 5.</b> Description and source of county-level variables considered and utilized in the current analysis                                                                                                                                                                                                                                                                                                                                                                                                                                                                                                                                                                                                     |
| Pg.16 | <b>Supplementary Table 6.</b> Diagnostics for spatial lag and spatial error models from ordinary least squares regression models assessing the association between racial/ethnic composition and community water system metal concentration estimates.                                                                                                                                                                                                                                                                                                                                                                                                                                                                             |

Pg.17

**Supplementary Fig. 8. Photocopy safe version for main manuscript Figures 2 and 3.** Direction and magnitude of the geometric mean ratio (GMR) of county-level community water system (CWS) arsenic and uranium concentrations per 10 percent higher county proportion of non-Hispanic Black, American Indian/Alaskan Native, Hispanic/Latino, and non-Hispanic White residents from geographically weighted regression models

2  
3  
4  
5

6 Supplementary Fig. 1. **Nationwide spatial distribution of county-level community water system (CWS) metal concentrations and local**  
 7 **indicators of spatial associations (LISA) clusters for barium (a) and selenium(b).** County-level CWS metal concentrations were originally  
 8 developed and described by Nigra et al. 2020 and Ravalli et al. 2022 and are categorized and colored by quintile in red scale. High-High LISA  
 9 clusters are shown in red, and Low-Low LISA clusters are shown in blue. Counties overlaid with gray hatch marks are missing CWS metal  
 10 concentration estimates.  
 11

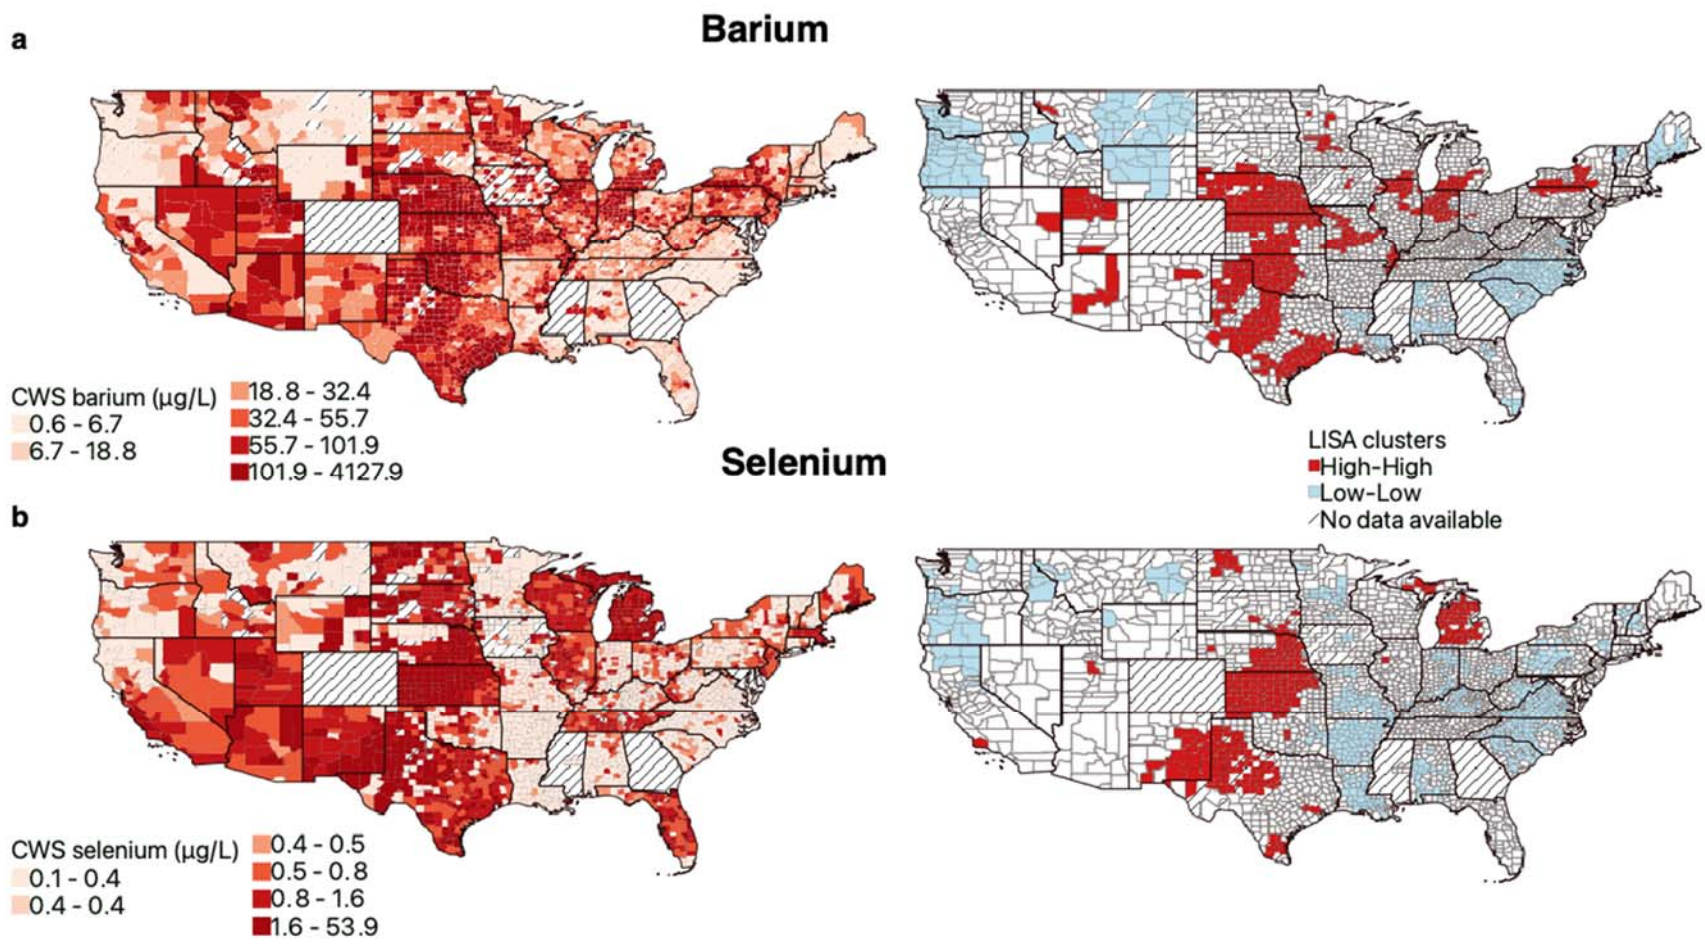

12

13  
14  
15  
16  
17  
18  
19  
20  
21

Supplementary Fig. 2. **Conceptual diagram for the county-level association between racial/ethnic composition and public drinking water metal concentrations.** Created at www.dagitty.net. The minimal sufficient adjustment set for estimating the direct effect of racial/ethnic composition on public water metal concentrations is: percent of other racial/ethnic groups, the percent of public water from groundwater supplies, population density, the percent of residents with a high school diploma, and median household income. Although we primarily treat median household income and the percent of adults with a high school diploma as confounders of the association between county racial/ethnic composition and public drinking water metal concentrations, these variables may also act as mediators of the association.

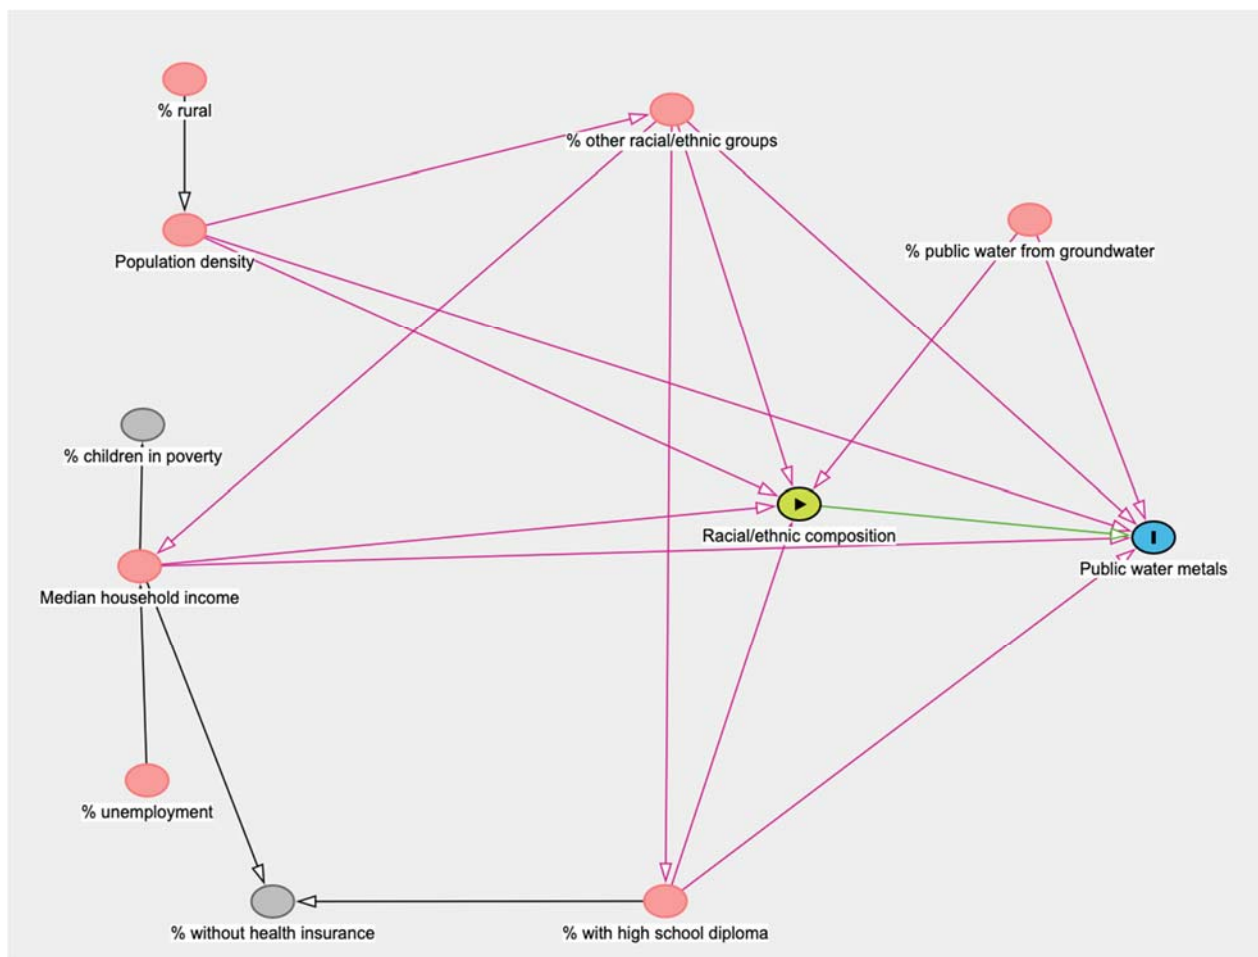

22

23  
24  
25  
26  
27  
28  
29  
30  
31  
32  
33

Supplementary Table 1. **Sensitivity analyses of geometric mean ratios (95% CI) of county-level community water system (CWS) metal concentration estimates (µg/L) per higher proportion of non-Hispanic Black, American Indian/Alaskan Native, Hispanic/Latino, and non-Hispanic White residents, from spatial lag regression models, assessing A) 60% higher proportion of residents in the specified racial/ethnic group, B) higher proportions of residents in the specified racial/ethnic group corresponding to the interquartile range (IQR), and C) per 10% higher proportion of residents in the specified racial/ethnic group, restricted to counties in the western US.** Spatial autocorrelation was modeled in Lagrange models with autoregressive correlation structure. County-level CWS arsenic, barium, selenium, and uranium were natural log-transformed for analysis. Models were adjusted for population density, the percent of public water sources from groundwater supplies, median household income, and the percent of adults with a high school diploma (Model 3). Coefficients for the spatial lag term were significant in all models.

|                                       | A. Per 60% higher proportion of residents of the specified racial/ethnic group |                   | B. Per higher proportion of residents of the specified racial/ethnic group corresponding to the IQR |      | IQR value | C. Per 10% higher proportion of residents of the specified racial/ethnic group, restricted to counties in the western US |  |
|---------------------------------------|--------------------------------------------------------------------------------|-------------------|-----------------------------------------------------------------------------------------------------|------|-----------|--------------------------------------------------------------------------------------------------------------------------|--|
|                                       | N                                                                              | GMR (95% CI)      | GMR (95% CI)                                                                                        | N    |           | GMR (95% CI)                                                                                                             |  |
| <i>Hispanic/Latino</i>                |                                                                                |                   |                                                                                                     |      |           |                                                                                                                          |  |
| Arsenic                               | 2341                                                                           | 1.40 (1.26, 1.56) | 1.04(1.03, 1.06)                                                                                    | 0.08 | 828       | 1.03 (1.00, 1.05)                                                                                                        |  |
| Uranium                               | 170                                                                            | 2.62 (2.09, 3.28) | 1.13 (1.10, 1.17)                                                                                   |      | 475       | 1.11 (1.06, 1.17)                                                                                                        |  |
| <i>non-Hispanic Black</i>             |                                                                                |                   |                                                                                                     |      |           |                                                                                                                          |  |
| Arsenic                               | 1848                                                                           | 0.62 (0.55, 0.71) | 0.92 (0.90, 0.94)                                                                                   | 0.10 | 526       | 0.89 (0.78, 1.01)                                                                                                        |  |
| Uranium                               | 832                                                                            | 0.57 (0.44, 0.75) | 0.91 (0.87, 0.95)                                                                                   |      | 296       | 1.13 (0.82,1.55)                                                                                                         |  |
| <i>American Indian/Alaskan Native</i> |                                                                                |                   |                                                                                                     |      |           |                                                                                                                          |  |
| Arsenic                               | 1522                                                                           | 1.55 (1.23, 1.96) | 1.01 (1.00, 1.01)                                                                                   | 0.01 | 640       | 1.02 (0.97, 1.08)                                                                                                        |  |
| Uranium                               | 778                                                                            | 1.17 (0.82, 1.66) | 1.00 (1.00, 1.01)                                                                                   |      | 391       | 0.94 (0.88, 1.02)                                                                                                        |  |
| <i>non-Hispanic White</i>             |                                                                                |                   |                                                                                                     |      |           |                                                                                                                          |  |
| Arsenic                               | 2585                                                                           | 0.94 (0.86, 1.01) | 0.97 (0.94, 1.01)                                                                                   | 0.24 | 939       | 0.99 (0.96, 1.01)                                                                                                        |  |
| Uranium                               | 1174                                                                           | 0.71 (0.60, 0.84) | 0.87 (0.81, 0.93)                                                                                   |      | 548       | 0.94 (0.90, 0.98)                                                                                                        |  |

34  
35  
36

37 Supplementary Table 2. **Geometric mean ratios (95% CI) of county-level community water system (CWS) arsenic and uranium**  
 38 **concentrations per a 10 percent higher proportion of all residents not categorized as non-Hispanic White, including non-Hispanic Black,**  
 39 **American Indian/Alaskan Native, Hispanic/Latino add the other Census groups here, from spatial lag regression models.** Spatial  
 40 autocorrelation was modeled in Lagrange models with autoregressive correlation structure. County-level CWS arsenic and uranium were natural  
 41 log-transformed for analysis. Model 1 adjusts for population density, the percent of public water sources from groundwater supplies, median  
 42 household income and the percent of adults with a high school diploma. Model 2 further adjusts for the racial/ethnic composition of other  
 43 racial/ethnic groups, except non-Hispanic White (leave-one-out model). Coefficients for the spatial lag term were significant in all models  
 44  
 45  
 46

|                | % Non-Hispanic White |              | All participants not categorized as non-Hispanic White |             |
|----------------|----------------------|--------------|--------------------------------------------------------|-------------|
|                | GMR                  | % Change     | GMR                                                    | %Change     |
| <b>Arsenic</b> |                      |              |                                                        |             |
| N              |                      | 2,585        |                                                        | 2511        |
| Model 1        | 0.99 (0.98, 1.00)    | -1% (-2, 0)  | 1.01 (0.99, 1.03)                                      | 1% (-1, 3)  |
| Model 2        |                      |              |                                                        |             |
| <b>Uranium</b> |                      |              |                                                        |             |
| N              |                      | 1,174        |                                                        | 1,148       |
| Model 1        | 0.95 (0.92, 0.97)    | -5% (-8, -3) | 1.10 (1.06, 1.14)                                      | 10% (6, 14) |
| Model 2        |                      |              |                                                        |             |

47  
 48  
 49  
 50  
 51  
 52  
 53  
 54  
 55  
 56  
 57  
 58  
 59

60 Supplementary Table 3. **Geometric mean ratios (95% CI) of county-level community water system (CWS) barium and selenium**  
61 **concentrations per a 10 percent higher proportion of non-Hispanic Black, American Indian/Alaskan Native, Hispanic/Latino, and non-**  
62 **Hispanic White residents, from spatial lag regression models.** Spatial autocorrelation was modeled in Lagrange models with autoregressive  
63 correlation structure. County-level CWS barium and selenium were natural log-transformed for analysis. Model 1 adjusts for population density,  
64 the percent of public water sources from groundwater supplies, median household income and the percent of adults with a high school diploma.  
65 Model 2 further adjusts for the racial/ethnic composition of other racial/ethnic groups, except non-Hispanic White (leave-one-out model).  
66 Coefficients for the spatial lag term were significant in all models. <sup>a</sup>Sensitivity analyses not adjusting for population density yielded similar findings.

67  
68  
69

|                 | % Non-Hispanic Black |                 | % American Indian/<br>Alaskan Native <sup>a</sup> |             | % Hispanic/Latino |           | % Non-Hispanic White |             | % All participants not<br>categorized as non-<br>Hispanic White |             |
|-----------------|----------------------|-----------------|---------------------------------------------------|-------------|-------------------|-----------|----------------------|-------------|-----------------------------------------------------------------|-------------|
|                 | GMR                  | % Change        | GMR                                               | % Change    | GMR               | % Change  | GMR                  | % Change    | GMR                                                             | %Change     |
| <b>Selenium</b> |                      |                 |                                                   |             |                   |           |                      |             |                                                                 |             |
| N               | 1,848                |                 | 1,522                                             |             | 2,341             |           | 2,555                |             | 2,512                                                           |             |
| <i>Model 1</i>  | 0.96 (0.94, 0.98)    | -4% (-6, -2)    | 1.03 (1.00, 1.07)                                 | 3% (0, 7)   | 1.05 (1.03, 1.07) | 5% (3, 7) | 0.99 (0.97, 1.00)    | -1% (-3, 0) | 1.02 (1.01, 1.03)                                               | 2% (1, 3)   |
| <i>Model 2</i>  | 0.97 (0.95, 0.99)    | -3% (-5, -1)    | 1.03 (1.00, 1.07)                                 | 3% (1, 7)   | 1.05 (1.03, 1.07) | 5% (3, 7) |                      |             |                                                                 |             |
| <b>Barium</b>   |                      |                 |                                                   |             |                   |           |                      |             |                                                                 |             |
| N               | 1848                 |                 | 1522                                              |             | 2,341             |           | 2,555                |             | 2,512                                                           |             |
| <i>Model 1</i>  | 0.86 (0.82, 0.89)    | -14% (-18, -11) | 1.08 (1.01, 1.15)                                 | 8% (1, 15)  | 1.05 (1.02, 1.08) | 5% (2, 8) | 1.01 (0.98, 1.03)    | 1% (-2, 3)  | 0.98 (0.95, 1.01)                                               | -2% (-5, 1) |
| <i>Model 2</i>  | 0.86 (0.83, 0.90)    | -14% (-17, -10) | 1.05 (0.98, 1.12)                                 | 5% (-2, 12) | 1.04 (1.01, 1.08) | 4% (1, 8) |                      |             |                                                                 |             |

70  
71  
72  
73  
74  
75  
76  
77  
78



79 Supplementary Fig. 3. **County-level  $R^2$  values from geographically weighted regression models assessing the association between a 10**  
80 **percent higher proportion of county population categorized as Hispanic/Latino, American Indian/Alaskan Native, non-Hispanic Black, and**  
81 **non-Hispanic White residents and geometric mean county-level community water system (CWS) and arsenic.** High  $R^2$  values are shown in  
82 darker colors and indicate a higher goodness-of-fit. Models were adjusted for population density, the percent of public drinking water supplied from  
83 groundwater sources, median household income, and the percent of residents with a high school diploma. Counties with missing data are shown  
84 with light gray hatch marks. The number of counties included in the geographically weighted regression analysis for each racial/ethnic group were:  
85 Non-Hispanic Black (n= 1,848), American Indian/Alaskan Native (n= 1,522), Hispanic/Latino (n= 2,341), and Non-Hispanic White (n = 2,585)  
86

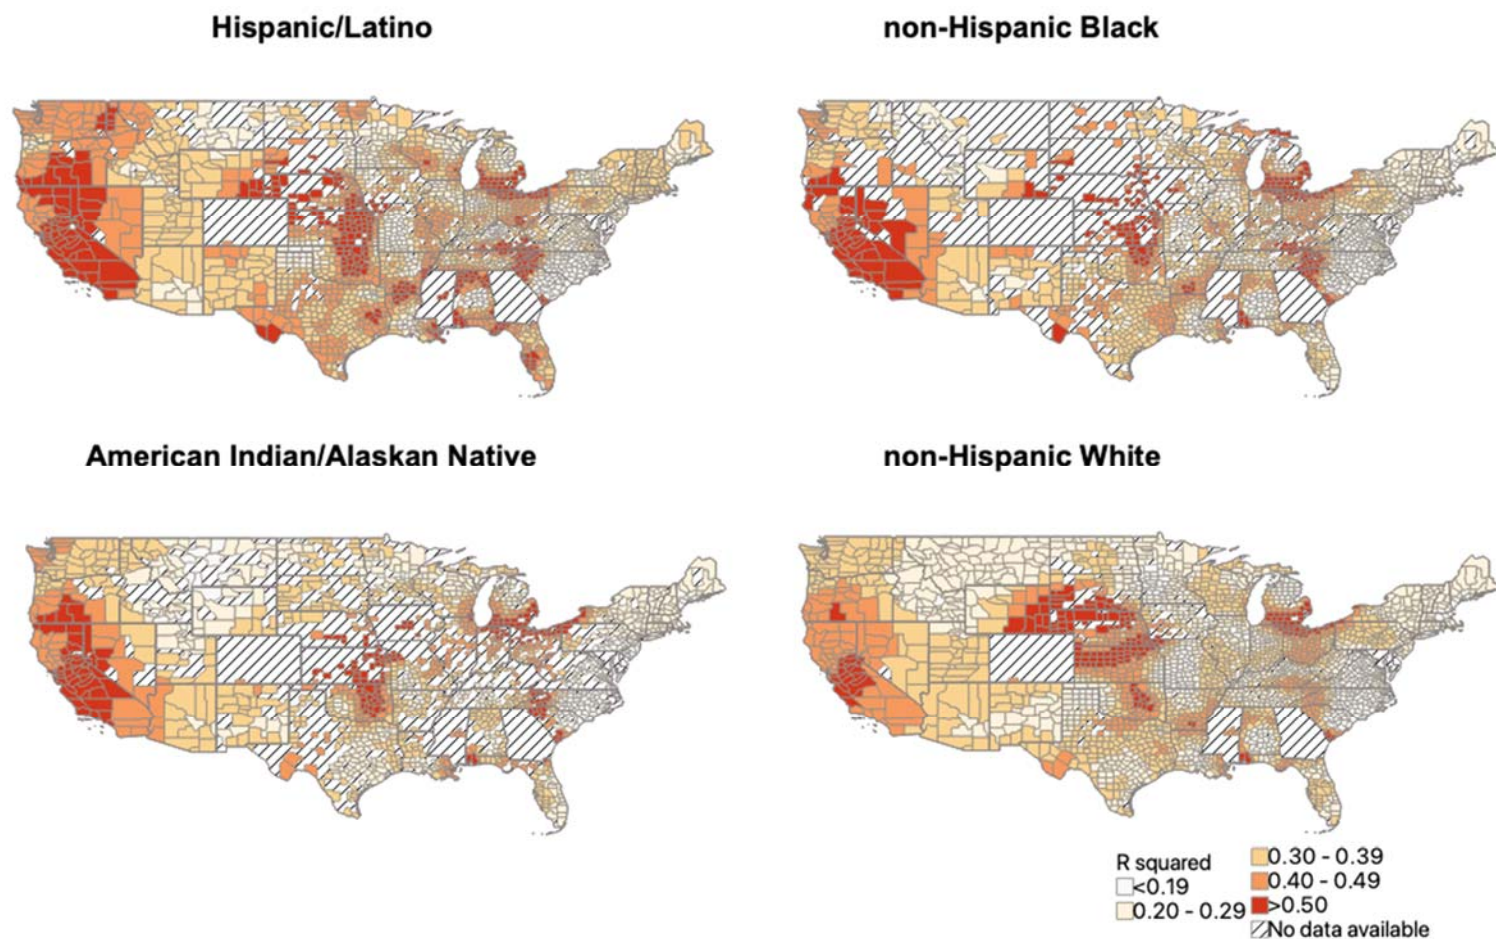

87  
88



89 Supplementary Fig. 4. **County-level  $R^2$  values from geographically weighted regression models assessing the association between a 10**  
90 **percent higher proportion of county population categorized as Hispanic/Latino, American Indian/Alaskan Native, non-Hispanic Black,**  
91 **and non-Hispanic White residents and geometric mean county-level community water system (CWS) and uranium.** High  $R^2$  values are  
92 shown in darker colors and indicate a higher goodness-of-fit. Models were adjusted for population density, the percent of public drinking water  
93 supplied from groundwater sources, median household income, and the percent of residents with a high school diploma. Counties with missing  
94 data are shown with light gray hatch marks. The number of counties included in the geographically weighted regression analysis for each  
95 racial/ethnic group were: Non-Hispanic Black (n= 832), American Indian/Alaskan Native (n= 778), Hispanic/Latino (n= 1,170), and Non-Hispanic  
96 White (n = 1,174)

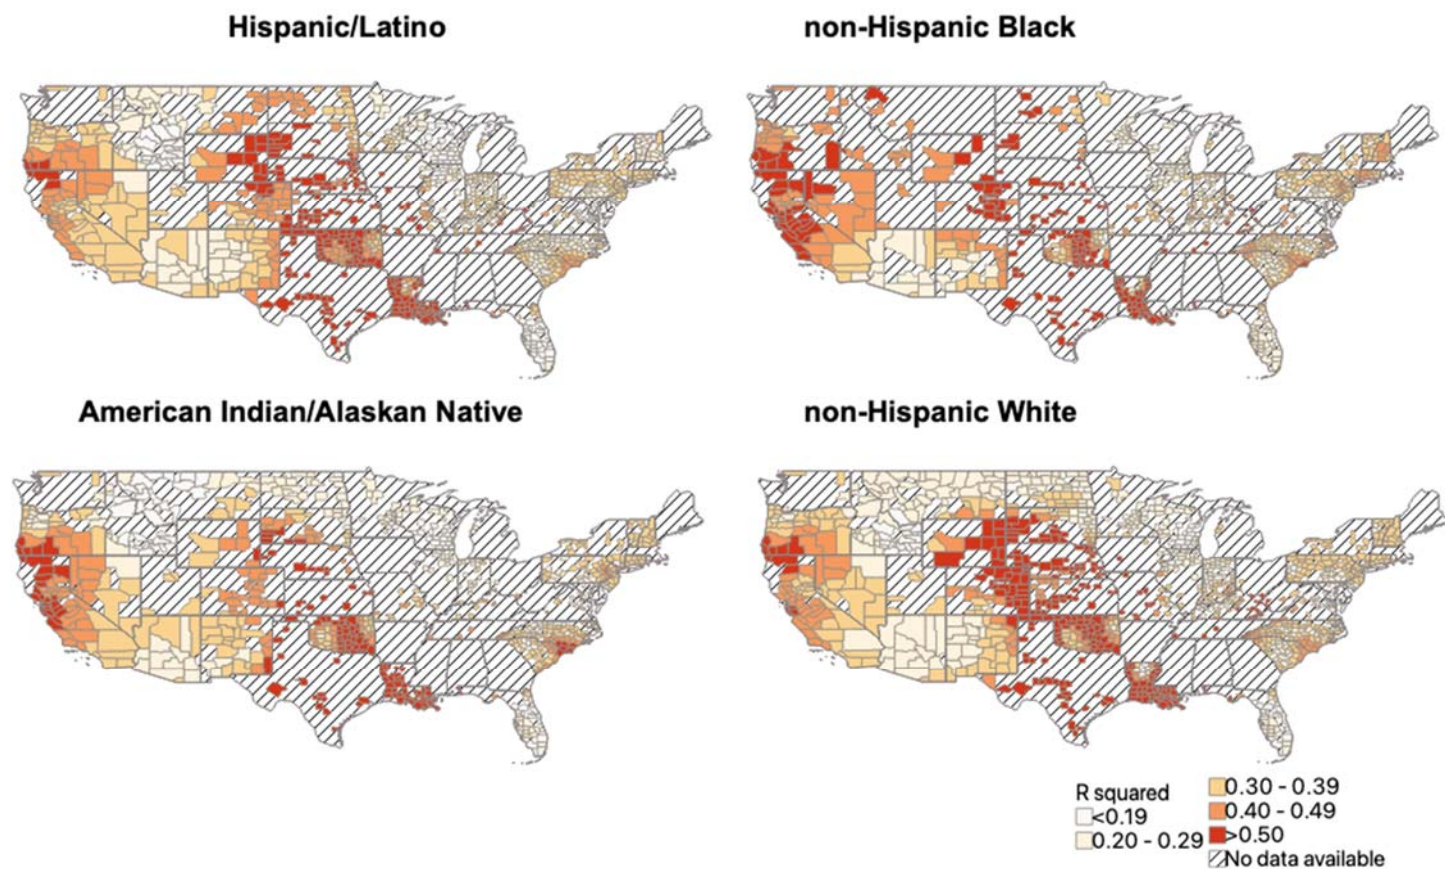

97  
98

99 Supplementary Fig. 5. **County-level  $R^2$  values from geographically weighted regression models assessing the association between a 10**  
 100 **percent higher proportion of county population categorized as Hispanic/Latino, American Indian/Alaskan Native, and non-Hispanic**  
 101 **Black, residents and geometric mean county-level community water system (CWS) and uranium.** High  $R^2$  values are shown in darker colors  
 102 and indicate a higher goodness-of-fit. Models were adjusted for population density, the percent of public drinking water supplied from groundwater  
 103 sources, median household income, and the percent of residents with a high school diploma. Counties with missing data are shown with light gray  
 104 hatch marks. The number of counties included in the geographically weighted regression analysis for each racial/ethnic group were: Non-Hispanic  
 105 Black (n= 1,848), American Indian/Alaskan Native (n= 1,522), Hispanic/Latino (n= 2,341).  
 106

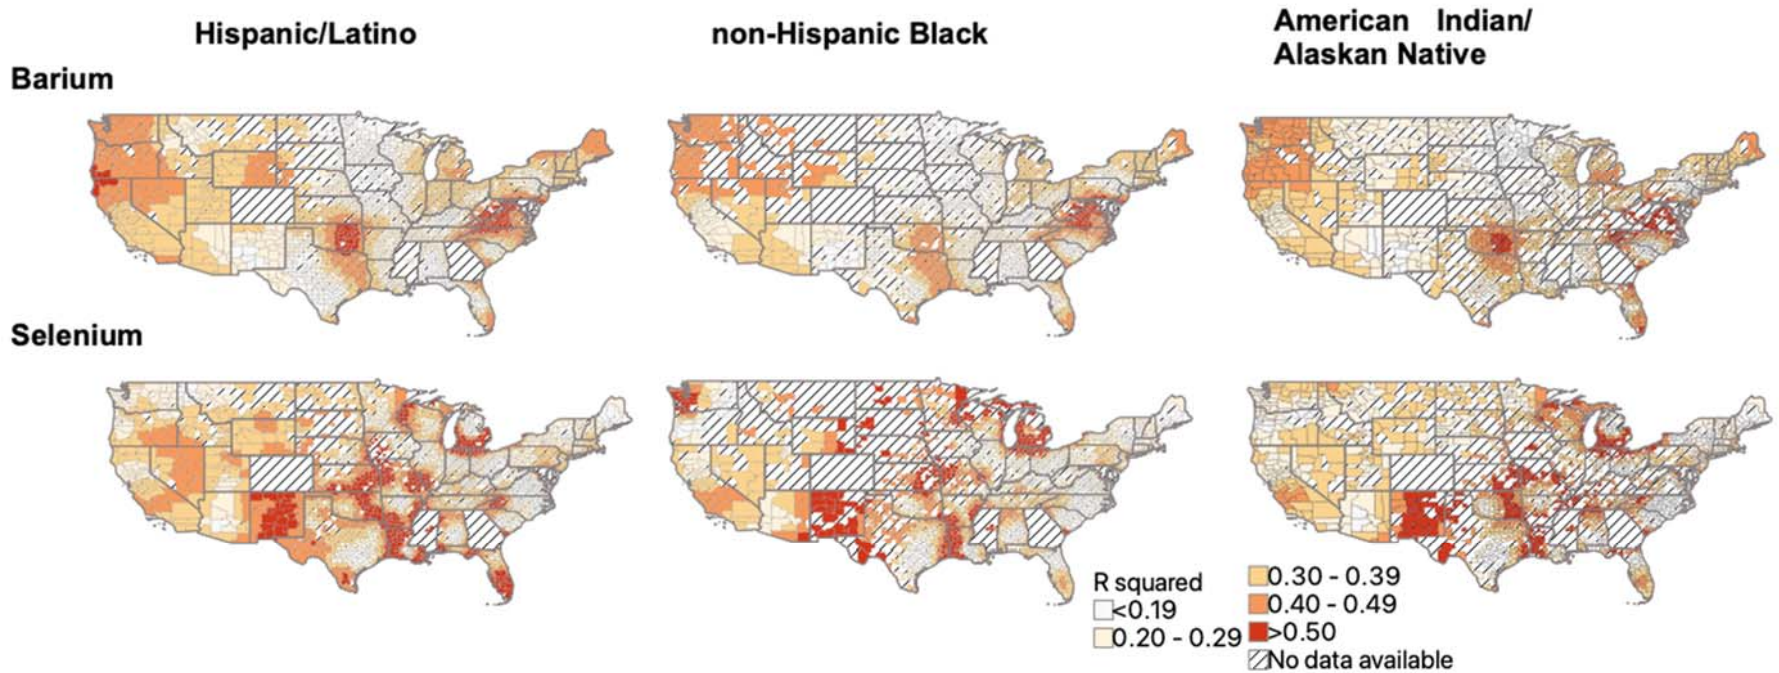

107



108 Supplementary Fig. 6. **Direction and magnitude of the geometric mean ratio (GMR) of county-level community water system (CWS) barium concentrations per 10 percent higher county proportion of non-Hispanic Black, American Indian/Alaskan Native, Hispanic/Latino, and non-Hispanic White residents from geographically weighted regression models.** Models were adjusted for population density, the percent of public drinking water supplied from groundwater sources, median household income, and the percent of residents with a high school diploma. Counties with a positive effect estimate (GMR>1) are shown in red scale colors, counties with a negative effect estimate (GMR<1) are shown in blue scale colors, and counties where a null effect estimate was observed are shown in white. Counties with missing data are shown with light gray hatch marks. The number of counties included in the geographically weighted regression analysis for each racial/ethnic group were Non-Hispanic Black (n= 1,848), American Indian/Alaskan Native (n= 1,522), Hispanic/Latino (n= 2,341), and non-Hispanic White (n = 2,555).

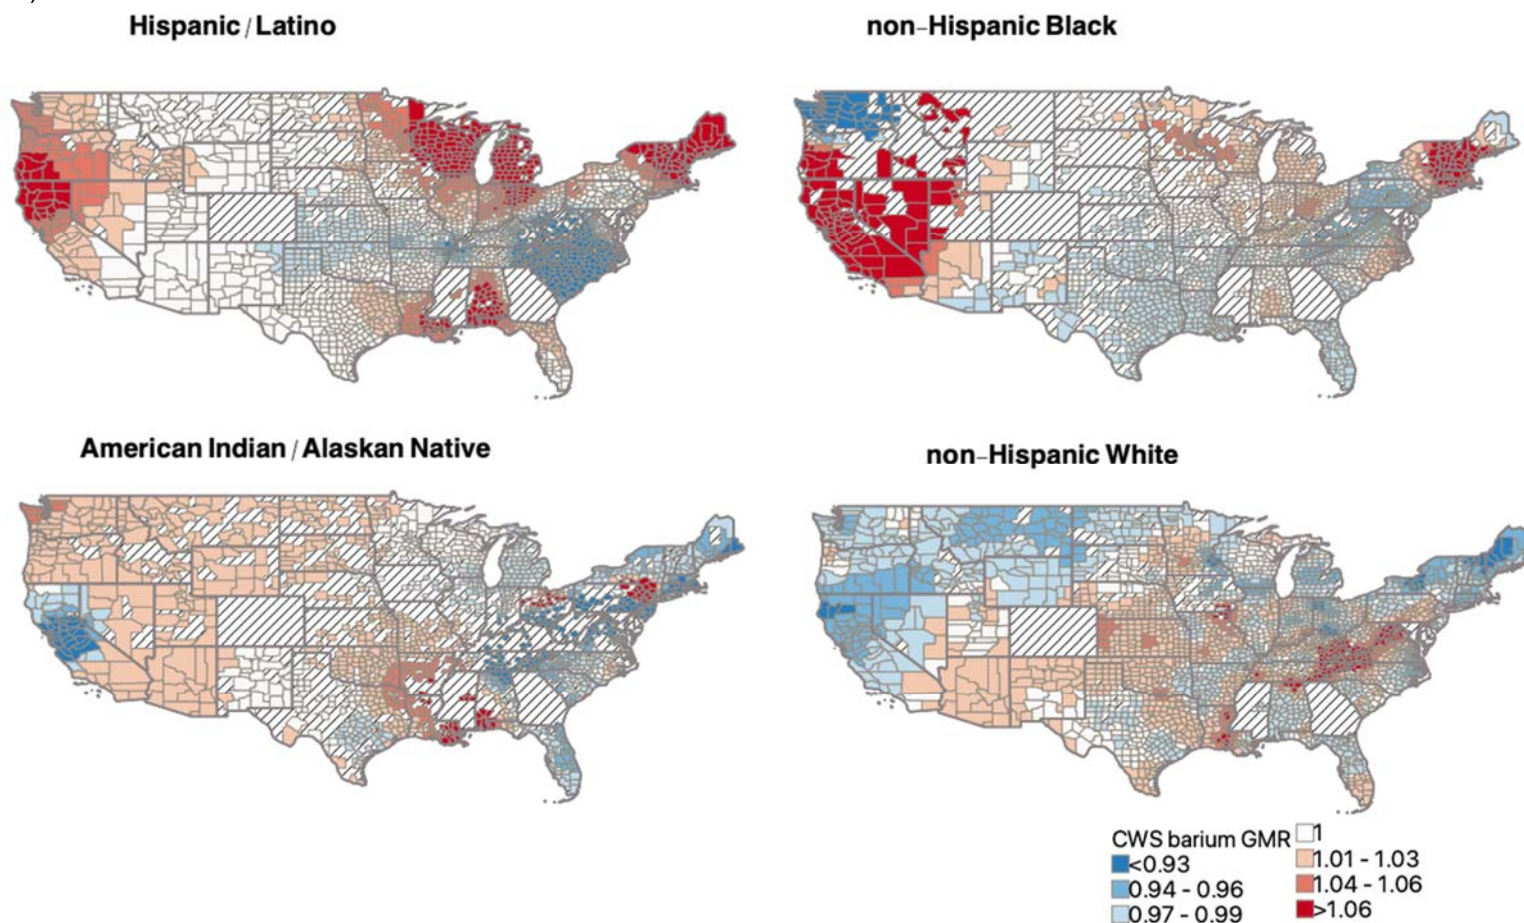

117

118 Supplementary Fig. 7. **Direction and magnitude of the geometric mean ratio (GMR) of county-level community water system (CWS)**  
 119 **selenium concentrations per 10 percent higher county proportion of non-Hispanic Black, American Indian/Alaskan Native,**  
 120 **Hispanic/Latino, and non-Hispanic White residents from geographically weighted regression models.** Models were adjusted for population  
 121 density, the percent of public drinking water supplied from groundwater sources, median household income, and the percent of residents with a  
 122 high school diploma. Counties with a positive effect estimate (GMR>1) are shown in red scale colors, counties with a negative effect estimate  
 123 (GMR<1) are shown in blue scale colors, and counties where a null effect estimate was observed are shown in white. Counties with missing data  
 124 are shown with light gray hatch marks. The number of counties included in the geographically weighted regression analysis for each racial/ethnic  
 125 group were Non-Hispanic Black (n= 1,848), American Indian/Alaskan Native (n= 1,522), Hispanic/Latino (n= 2,341), and non-Hispanic White (n =  
 126 2,555).

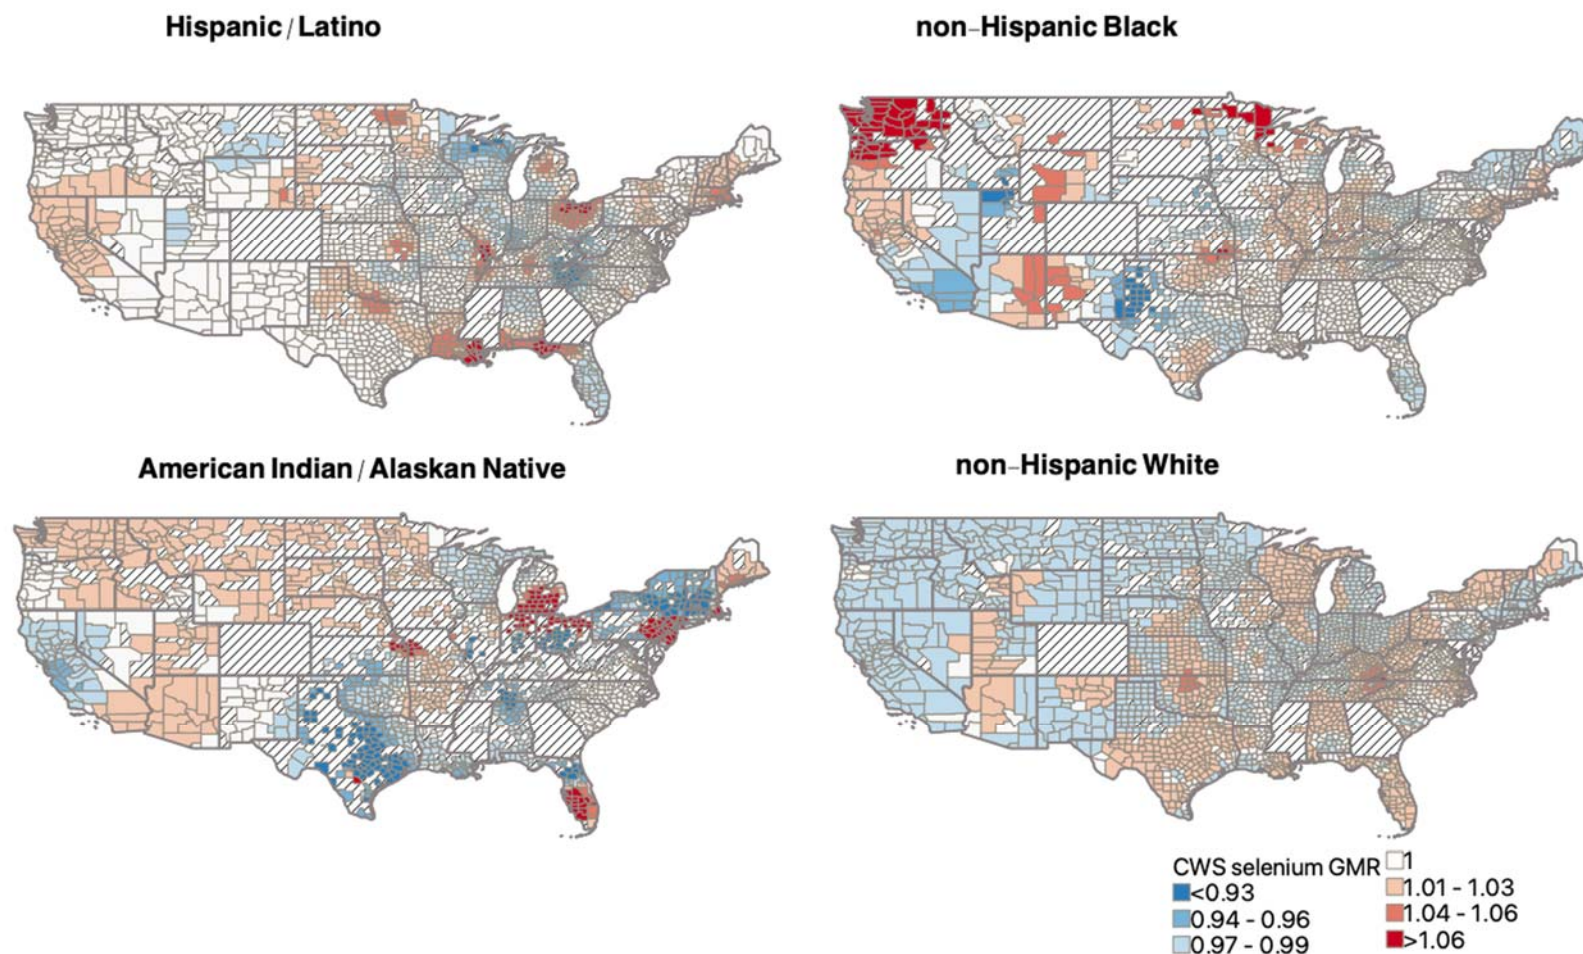

128  
129  
130  
131  
132

Supplementary Table 4. **County-level mean estimated community water system (CWS) metal concentrations and sociodemographic characteristics for all counties excluded from the analysis (counties with < 100 residents of each racial/ethnic group). No counties were excluded for having <100 non-Hispanic White residents.**

|                                                                            | All conterminous<br>US counties | <100 non-Hispanic<br>Black residents | <100 Hispanic/Latino<br>residents | <100 American<br>Indian/Alaskan<br>Native residents | Missing CWS<br>metal<br>concentration<br>estimates |
|----------------------------------------------------------------------------|---------------------------------|--------------------------------------|-----------------------------------|-----------------------------------------------------|----------------------------------------------------|
| N                                                                          | 3158                            | 757                                  | 246                               | 1078                                                | 473                                                |
| <i>CWS metal estimates (mean, SD)</i>                                      |                                 |                                      |                                   |                                                     |                                                    |
| Arsenic (2006-2011)                                                        | 1.45 (2.3)<br>N= 2661           | 2.17 (2.97)<br>N= 737                | 2.04 (3.42)<br>N= 244             | 1.51 (2.53)<br>N= 1063                              | NA                                                 |
| Uranium (2000-2011)                                                        | 3.52 (6.87)<br>N= 1192          | 5.88 (10.12)<br>N= 342               | 4.33 (8.3)<br>N= 104              | 4.9 (9.42)<br>N= 396                                | NA                                                 |
| Selenium (2006-2011)                                                       | 56.74 (105.75)<br>N= 2603       | 68.25 (79.82)<br>N= 648              | 64.25 (70.63)<br>N= 235           | 62.79 (79.11)<br>N= 1044                            | NA                                                 |
| Barium (2006-2011)                                                         | 1.34 (2.67)<br>N= 2603          | 2.09 (3.83)<br>N= 715                | 1.94 (4.74)<br>N= 235             | 1.72 (3.5)<br>N= 1044                               | NA                                                 |
| <i>Sociodemographic characteristics</i>                                    |                                 |                                      |                                   |                                                     |                                                    |
| Population size (mean, SD)                                                 | 196007 (1195195)                | 10755 (8187)                         | 5861 (4024)                       | 15459 (12598)                                       | 707480<br>(2932434)                                |
| Population density (mean, SD)                                              | 264 (1728)                      | 17 (19)                              | 19 (77)                           | 49 (151)                                            | 279 (944)                                          |
| % public drinking water sourced<br>from groundwater supplies<br>(mean, SD) | 63 (42)                         | 76 (39)                              | 72 (42)                           | 70 (42)                                             | 68 (43)                                            |
| Median household income (mean,<br>SD)                                      | 43848 (11029)                   | 42400 (8166)                         | 39623 (7466)                      | 41039 (8318)                                        | 42974 (13327)                                      |
| % adults with high school diploma<br>(mean, SD)                            | 83 (10)                         | 86 (10)                              | 86 (11)                           | 86 (10)                                             | 78 (12)                                            |
| % population living in rural area<br>(mean, SD)                            | 58 (32)                         | 81 (23)                              | 95 (15)                           | 77 (25)                                             | 58 (33)                                            |
| <i>Racial/ethnic composition (mean, SE)</i>                                |                                 |                                      |                                   |                                                     |                                                    |
| % non-Hispanic Black                                                       | 9(14.5)                         | 3.6 (3.2)                            | 3.7 (13)                          | 6.5 (14)                                            | 20 (21)                                            |
| % American Indian/Alaskan Native                                           | 1.7 (661)                       | 3 (10)                               | 2.8 (10)                          | 0.4 (0.3)                                           | 1 (6)                                              |
| % Hispanic/Latino                                                          | 8.4 (13)                        | 8 (15)                               | 1.5 (1.6)                         | 6 (13)                                              | 6 (7)                                              |
| % non-Hispanic White                                                       | 78.5 (19.5)                     | 87 (17)                              | 90 (16)                           | 85 (18)                                             | 70 (21)                                            |

133

134  
135

Supplementary Table 5. **Description and source of county-level variables considered and utilized in the current analysis.**

| Variable and description                                                                                                                                                                                                                                                                                                                                                                   | Source                                                                                                                                                                                                                                                                                                                                                                                              |
|--------------------------------------------------------------------------------------------------------------------------------------------------------------------------------------------------------------------------------------------------------------------------------------------------------------------------------------------------------------------------------------------|-----------------------------------------------------------------------------------------------------------------------------------------------------------------------------------------------------------------------------------------------------------------------------------------------------------------------------------------------------------------------------------------------------|
| <b>County-level community water system (CWS) metal concentration estimates:</b>                                                                                                                                                                                                                                                                                                            | Previously developed and described in detail by Nigra et al. 2020 <sup>1</sup> and Ravalli et al. 2022 <sup>2</sup> . Developed from routine compliance monitoring records collected by the US EPA for the National Contaminant Occurrence Database in support of the Second (2000-2005) and Third (2006-2011) Six Year Review. Estimates are publicly available via:                               |
| County-level, population-weighted CWS metal concentration estimates (mean, 95 <sup>th</sup> percentile) for arsenic, uranium, selenium, and barium. Arsenic, selenium, and barium estimates are for the period 2006-2011, and uranium estimates are for the period 2000-2011 to account for the different compliance monitoring periods required for uranium under the Radionuclides Rule. | <ul style="list-style-type: none"> <li>• <a href="https://github.com/annenigra/US-PublicWaterSystem-Metal-Estimates">https://github.com/annenigra/US-PublicWaterSystem-Metal-Estimates</a></li> <li>• <a href="https://msph.shinyapps.io/drinking-water-dashboard/">https://msph.shinyapps.io/drinking-water-dashboard/</a></li> </ul>                                                              |
| <b>Racial/ethnic composition variables:</b>                                                                                                                                                                                                                                                                                                                                                |                                                                                                                                                                                                                                                                                                                                                                                                     |
| County-level % non-Hispanic African American, % American Indian or Alaskan Native, % Asian, % Native Hawaiian or Other Pacific Islander, % Hispanic, % non-Hispanic White residents.                                                                                                                                                                                                       | Estimates were derived from 2011 US Census Population Estimates <sup>3</sup>                                                                                                                                                                                                                                                                                                                        |
| <b>Percent of population living in rural areas</b>                                                                                                                                                                                                                                                                                                                                         | Previously developed and published in the 2013 County Health Ranking database by the University of Washington Population Health Institute .                                                                                                                                                                                                                                                         |
| <b>Percent of adults with a high school diploma</b>                                                                                                                                                                                                                                                                                                                                        | <p>Estimates were derived from 2011 US Census Population Estimates.</p> <p>Previously developed and published in the 2013 County Health Ranking database by the University of Washington Population Health Institute<sup>4</sup></p>                                                                                                                                                                |
| <b>Median household income</b>                                                                                                                                                                                                                                                                                                                                                             | <p>Estimates were derived from the 2007-2011 US Census American Community Survey.</p> <p>Previously developed and published in the 2013 County Health Ranking database by the University of Washington Population Health Institute <sup>4</sup></p> <p>Estimates were derived from the 2011 Small Area Income and Poverty Estimates and 2010-2011 National Center for Education Statistics data</p> |
| <b>Percent of residents without health insurance</b>                                                                                                                                                                                                                                                                                                                                       | <p>Previously developed and published in the 2013 County Health Ranking database by the University of Washington Population Health Institute <sup>4</sup></p> <p>Estimates were derived from the 2010 Small Area Health Insurance Estimates.</p>                                                                                                                                                    |
| <b>Percent unemployment</b>                                                                                                                                                                                                                                                                                                                                                                | Previously developed and published in the 2013 County Health Ranking database by the University of Washington Population Health Institute <sup>4</sup>                                                                                                                                                                                                                                              |

|                                                                                                                                  |                                                                                                                                                                                                                                                                                                         |
|----------------------------------------------------------------------------------------------------------------------------------|---------------------------------------------------------------------------------------------------------------------------------------------------------------------------------------------------------------------------------------------------------------------------------------------------------|
|                                                                                                                                  | Estimates were derived from 2011 Bureau of Labor Statistics data.                                                                                                                                                                                                                                       |
| <b>Percent of children living below poverty level, and<br/>Percent of public school children eligible for free/reduced lunch</b> | Previously developed and published in the 2013 County Health Ranking database by the University of Washington Population Health Institute <sup>4</sup><br><br>Estimates were derived from the 2011 Small Area Income and Poverty Estimates and 2010-2011 National Center for Education Statistics data. |
| <b>Population density</b>                                                                                                        | Estimates were derived from the 2010 US Census <sup>3</sup> .                                                                                                                                                                                                                                           |
| <b>Percent of public drinking water supplied by groundwater sources</b>                                                          | Estimates were calculated by the US Geological Survey for 2010 <sup>5</sup>                                                                                                                                                                                                                             |
| <b>Social Vulnerability Index for socioeconomic status</b>                                                                       | Extracted from the Center for Disease Control(CDC)/Agency for Toxic Substances and Disease Registry (ATSDR) 2010 and 2014 database <sup>6</sup>                                                                                                                                                         |

136  
137



138 Supplementary Table 6. **Diagnostics for spatial lag and spatial error models from ordinary least squares (OLS) regression models**  
 139 **assessing the association between racial/ethnic composition and community water system metal concentration estimates.** The OLS  
 140 model estimates for the two-sided Shapiro Wilk test to assess the normality of residuals are presented in column 2. Statistically significant values  
 141 indicate a non-normal distribution of residuals. In columns 3 to 6, the estimates from the one-sided Lagrange Multiplier (LM) test for a missing  
 142 spatially lagged dependent variable (lag), and for error dependence (error) , and the respective p values are presented. Statistically significant  
 143 values indicate the presence of spatial dependence, a higher magnitude of the estimate indicate a better goodness of fit of the model to address  
 144 spatial autocorrelation of errors. All models were adjusted for population density, the percent of public water sources from groundwater supplies,  
 145 median household income, percent of adults with a high school diploma, and the racial/ethnic composition of other racial/ethnic groups, except  
 146 non-Hispanic White (leave-one-out model). Models assessing increases in the proportion of non-Hispanic White residents were not adjusted for  
 147 the proportion of Hispanic residents (leave-one-out model). Estimates were considered statistically significant when p value <0.01, significant p  
 148 values are indicated with a \* symbol next to the estimates.  
 149

|                                          | OLS Regression    | Spatial Regression |               |
|------------------------------------------|-------------------|--------------------|---------------|
|                                          | Shapiro Wilk test | Spatial Lag        | Spatial Error |
| <i>Non-Hispanic African American</i>     |                   |                    |               |
| Arsenic                                  | 0.9575*           | 7.6249*            | 8.1938*       |
| Uranium                                  | 0.9569*           | 1.534              | 1.3625        |
| Selenium                                 | 0.9003*           | 8.7594*            | 7.1913*       |
| Barium                                   | 0.9495*           | 13.931*            | 10.218*       |
| <i>American Indian or Alaskan Native</i> |                   |                    |               |
| Arsenic                                  | 0.9679*           | 7.6249*            | 8.1938*       |
| Uranium                                  | 0.9572*           | 1.534              | 1.3625        |
| Selenium                                 | 0.9007*           | 8.7594*            | 7.1913*       |
| Barium                                   | 0.9491*           | 13.931*            | 10.218*       |
| <i>Hispanic</i>                          |                   |                    |               |
| Arsenic                                  | 0.9679*           | 7.6249*            | 8.1938*       |
| Uranium                                  | 0.9572*           | 1.534              | 1.3625        |
| Selenium                                 | 0.9007*           | 8.7594*            | 7.1913        |
| Barium                                   | 0.9491*           | 13.931*            | 10.218        |
| <i>non-Hispanic White</i>                |                   |                    |               |
| Arsenic                                  | 0.9565*           | 7.5254*            | 7.2982*       |
| Uranium                                  | 0.9392*           | 1.4026             | 1.2575        |
| Selenium                                 | 0.8993*           | 8.7549*            | 6.9567*       |
| Barium                                   | 0.9488*           | 13.814*            | 10.003*       |

150

151 Supplementary Fig. 8 **Photocopy safe version for main manuscript Figures 2 (a) and 3(b).** Direction and magnitude of the geometric mean  
 152 ratio (GMR) of county-level community water system (CWS) arsenic (a) and uranium (b) concentrations per 10 percent higher county proportion of  
 153 non-Hispanic Black, American Indian/Alaskan Native, Hispanic/Latino, and non-Hispanic White residents from geographically weighted regression  
 154 models

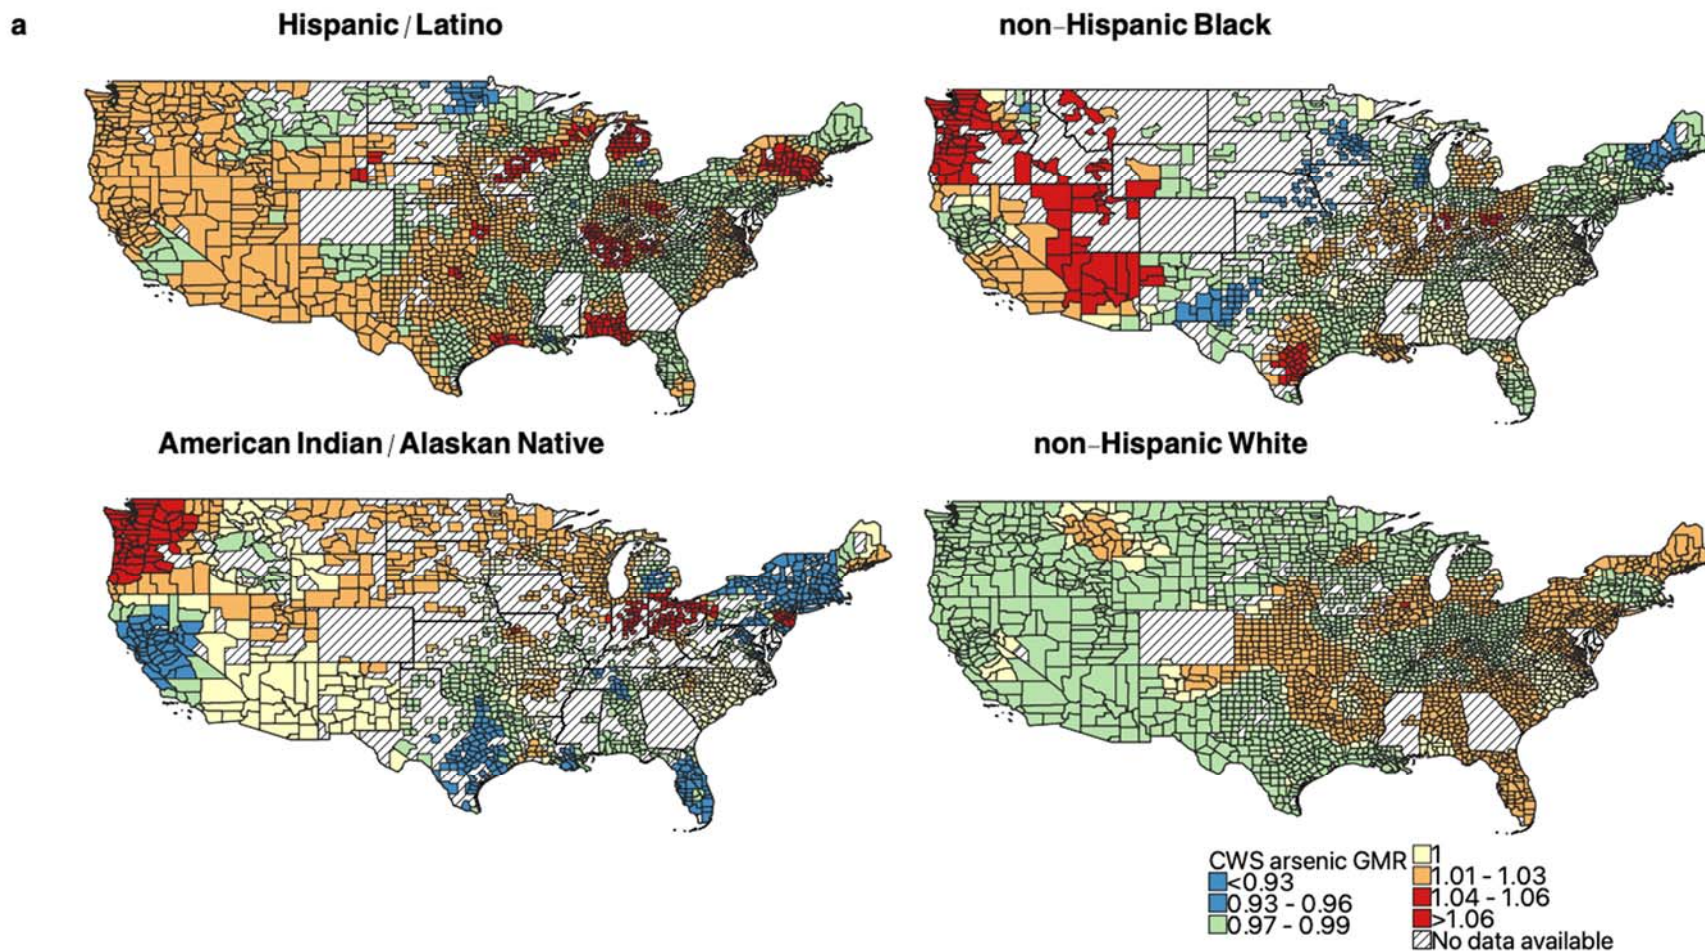

155

b

Hispanic / Latino

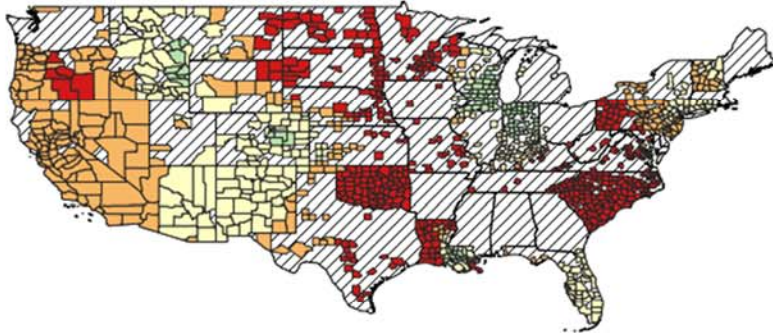

non-Hispanic Black

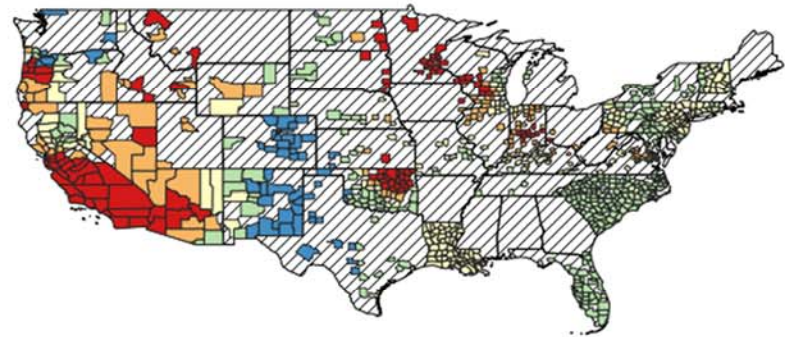

American Indian / Alaskan Native

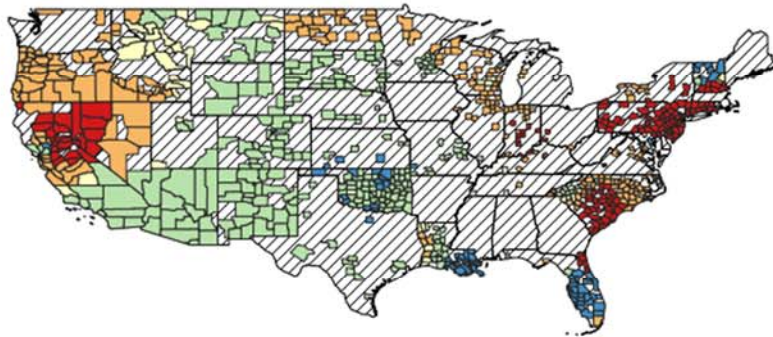

non-Hispanic White

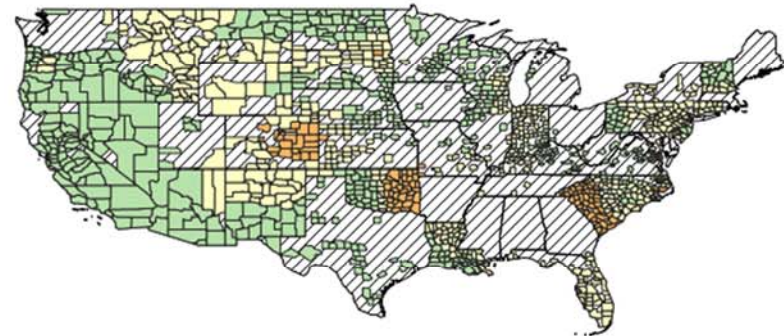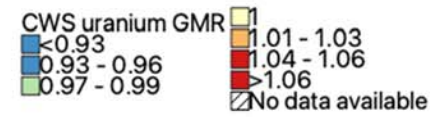

156  
157  
158  
159  
160  
161  
162

163 **Supplementary References**

164

165

166 1. Nigra, A. E. et al. Inequalities in public water arsenic concentrations in counties and community water systems across the United  
167 States, 2006–2011. *Environ. Health Perspect.* **128**, 12 (2020).

168 2. Ravalli, F. et al. Sociodemographic inequalities in uranium and other metals in community water systems across the US,  
169 2006-2011. *Lancet Planet. Health.* **6**, E-320-E330 (2022).

170 3. Bureau, U. C. USA Counties: 2011. Census.gov [https://www.census.gov/library/publications/2011/compendia/usa-counties-](https://www.census.gov/library/publications/2011/compendia/usa-counties-2011.html)  
171 [2011.html](https://www.census.gov/library/publications/2011/compendia/usa-counties-2011.html), (2011)

172 4. County Health Rankings & Roadmaps. Rankings Data & Documentation. National Data & Documentation: 2010-2018.  
173 [https://www.countyhealthrankings.org/explore-health-rankings/rankings-data-documentation/national-data-documentation-2010-](https://www.countyhealthrankings.org/explore-health-rankings/rankings-data-documentation/national-data-documentation-2010-2018)  
174 [2018.](https://www.countyhealthrankings.org/explore-health-rankings/rankings-data-documentation/national-data-documentation-2010-2018), (2013).

175 5. Maupin, M. A. et al. Estimated use of water in the United States in 2010. Estimated use of water in the United States in 2010  
176 vol. 1405 64 <http://pubs.er.usgs.gov/publication/cir1405>, (2014).

177 6. Centers for Disease Control and Prevention/ Agency for Toxic Substances and Disease Registry/ Geospatial Research,  
178 Analysis, and Services Program. 2010 Social Vulnerability Index database.

179 [https://www.atsdr.cdc.gov/placeandhealth/svi/data\\_documentation\\_download.html](https://www.atsdr.cdc.gov/placeandhealth/svi/data_documentation_download.html), (2021).

180

181

182

183
